# Supplementary material for: SNAI2 and TWIST1 in lymph node progression in early stages of NSCLC patients
Source: PubMed Central journal article supplement (PMC6051239; doi:10.1002/cam4.1545), 2018-05-29
Supplement: CAM4-7-3278-s001.pdf [file CAM4-7-3278-s001.pdf]

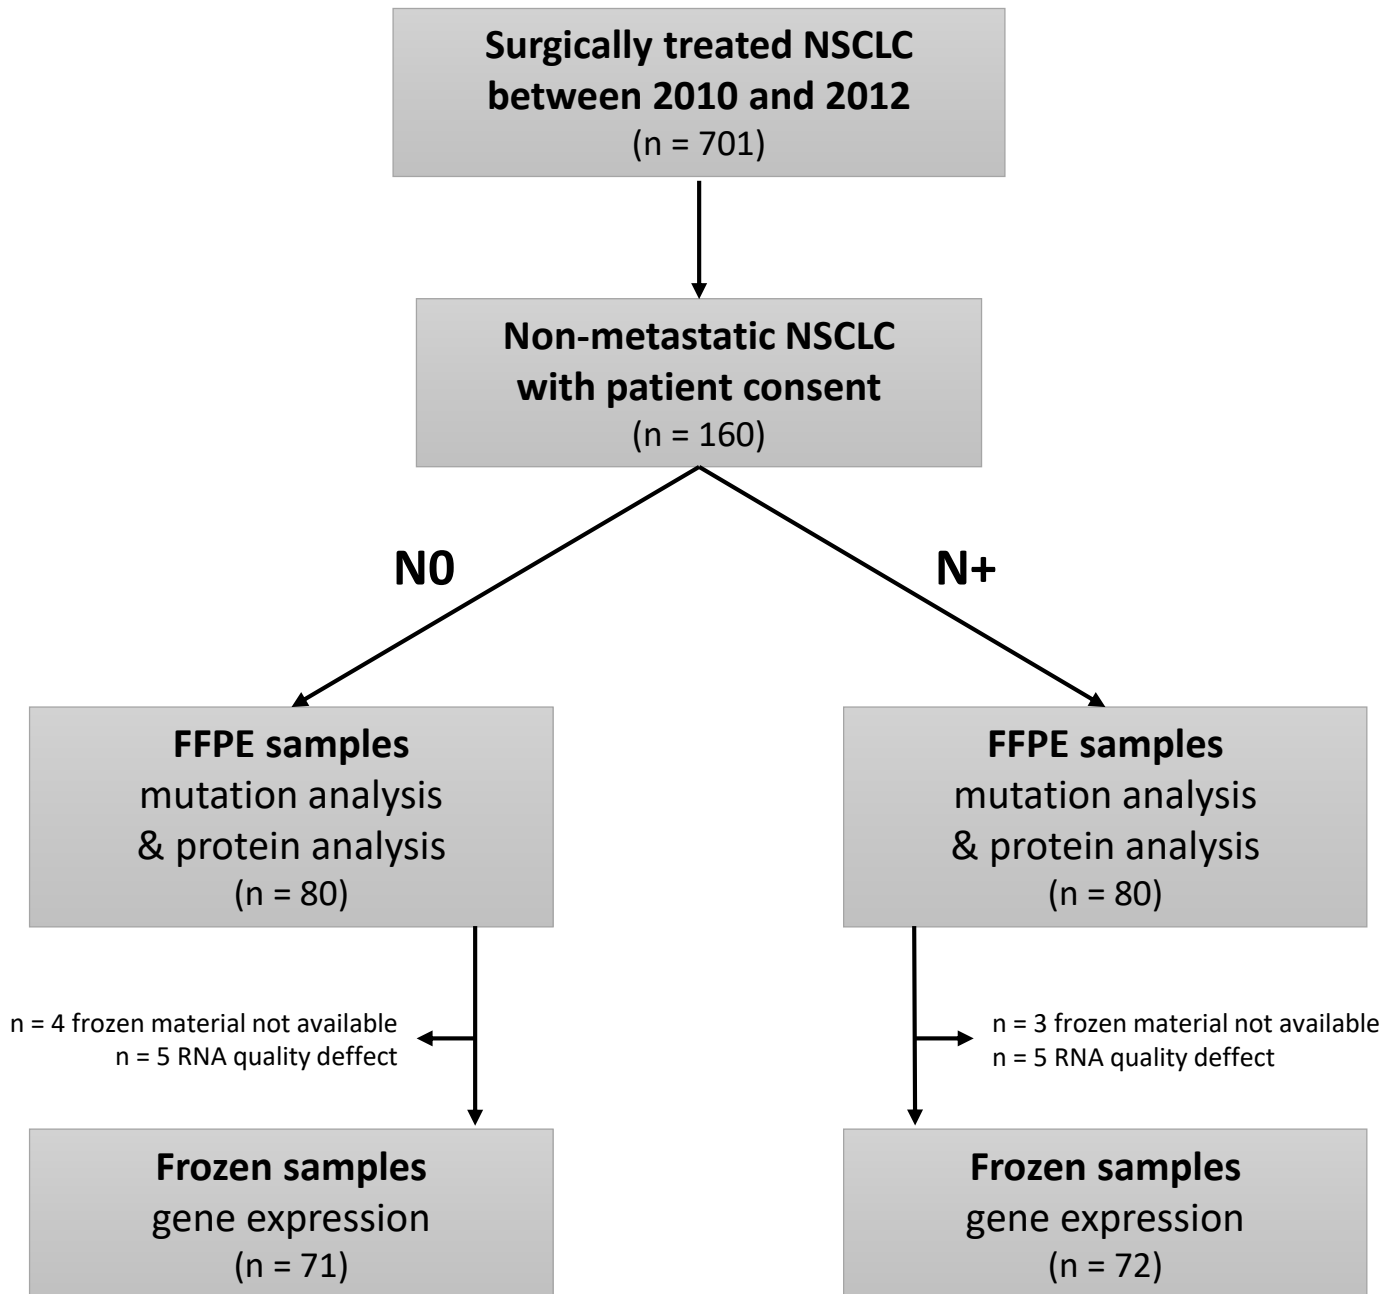

Supplementary data, Figure S1.

CAIX

c-MET

ADC

SCC

ADC

SCC

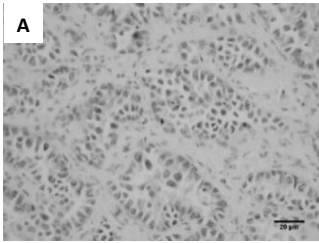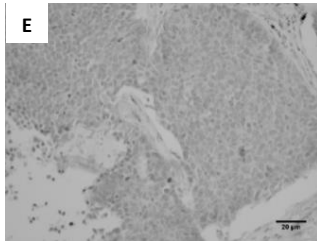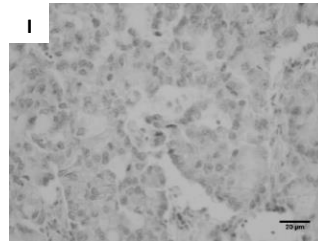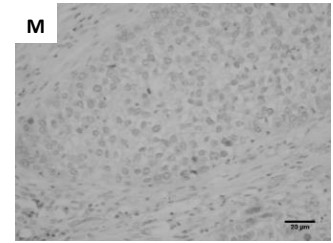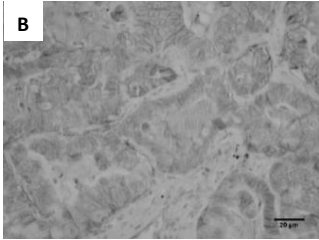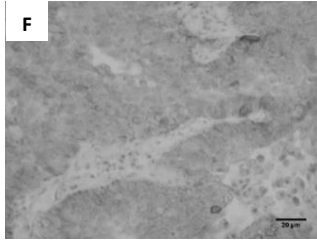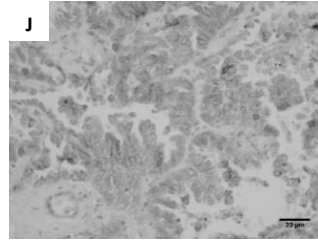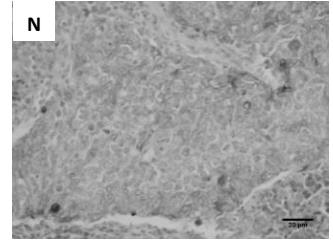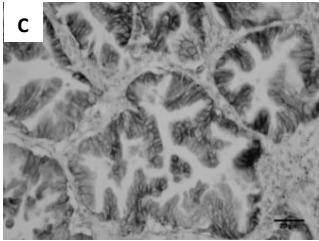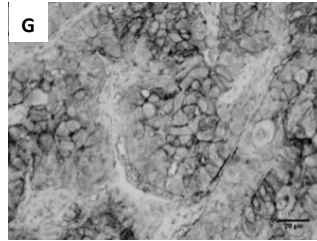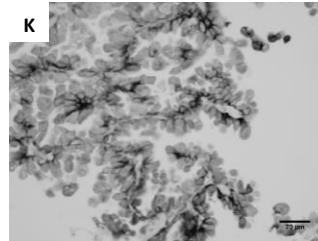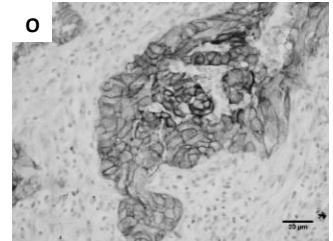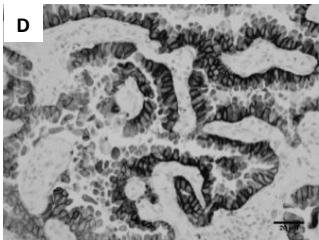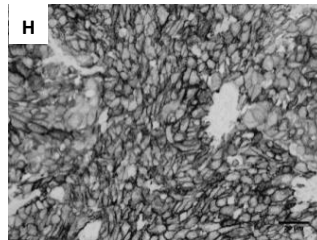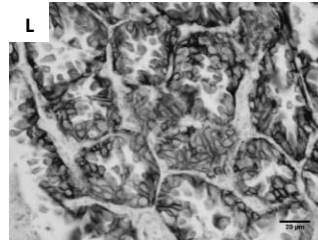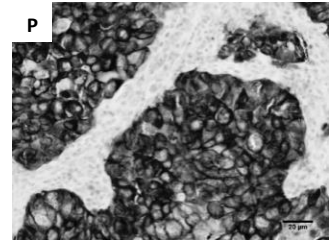

Supplementary data, Figure S2.
